# Supplementary material for: History of the Wastewater Assessment of Polio and Non-Polio Enteroviruses in the Slovak Republic in 1963–2019
Source: MDPI journal article supplement (doi:10.3390/v14081599), 2022-07-22
Supplement: s1 [file s1]

**Supplementary Table S1.** Overview of methods used for wastewater (WW) treatment and cell cultures used for isolation of EVs from WW in the Slovak Republic from 1963 to the present date.

| Period           | Methods used for sample processing                                                                                                                                  | Volume of waste water processed | Period           | Cell cultures used for isolation EVs                                                                                                                                                              |
|------------------|---------------------------------------------------------------------------------------------------------------------------------------------------------------------|---------------------------------|------------------|---------------------------------------------------------------------------------------------------------------------------------------------------------------------------------------------------|
| 1963-1968        | the concentration method included extraction with chloroform                                                                                                        | 1-5 litres                      | 1962-1990        | mainly - monkey kidney cells and the human diploid embryonic lung cells (LEP)<br><br>but also - HeLa cells, chicken fibroblasts, buffalo green monkey kidney (BGM) cells and human amniotic cells |
| 1968-1969        | the concentration method included extraction with chloroform, with added aluminium hydroxide                                                                        | 1-5 litres                      |                  |                                                                                                                                                                                                   |
| 1970-1986        | the concentration method included extraction with chloroform                                                                                                        | 1-5 litres                      |                  |                                                                                                                                                                                                   |
| 1986-1994        | the flocculation method with the use of aluminium sulphate                                                                                                          | 10 litres                       |                  |                                                                                                                                                                                                   |
| 1994-1998        | the flocculation method with the use of aluminium sulphate and the two-phase separation method with dextran and polyethylene glycol (PEG) (in NRC for poliomyelitis | 1-5 litres<br>1 litre           | 1991-1996        | cell lines human rhabdomyosarcoma-derived (RD) and human epidermoid carcinoma (Hep2)                                                                                                              |
| 1999-present day | the two-phase separation method with dextran and polyethylene glycol (PEG)                                                                                          | 1 litre                         | 1997-present day | cell lines human rhabdomyosarcoma-derived (RD), human epidermoid carcinoma (Hep2) and genetically modified mouse cell lines with the human poliovirus receptor (L20B)                             |
