# Supplementary material for: History of the Wastewater Assessment of Polio and Non-Polio Enteroviruses in the Slovak Republic in 1963–2019
Source: Viruses. 2022 Jul 22;14(8):1599. doi: 10.3390/v14081599 (PMC9331368; doi:10.3390/v14081599)
Supplement: Supplementary file 1 [file viruses-14-01599-s001.zip]

Archive with 4 entries (4 files):
- Final Methods Supplementary Table S1.pdf
- Supplementary Table S2 Bratislava Sewage Waters.xlsx
- Supplementary Table S3 BBystrica Sewagewaters.xlsx
- Supplementary Table S4 Kosice Sewagewaters.xlsx
