# Supplementary material for: History of the Wastewater Assessment of Polio and Non-Polio Enteroviruses in the Slovak Republic in 1963–2019
Source: Viruses. 2022 Jul 22;14(8):1599. doi: 10.3390/v14081599 (PMC9331368; doi:10.3390/v14081599)
Supplement: Supplementary file 1 [file viruses-14-01599-s001.zip › Supplementary Table S2 Bratislava Sewage Waters.xlsx]

## Sheet: Hárok1
	Supplementary Table S2
	Bratislava Laboratory- Sewage water sampling
	Year	number of waters examined	number of positive isolations	PV (not specified)	Locality PV	PV 1*	Locality PV1	PV 2 *	Locality PV2	PV 2 VDPV**	Locality P2 VDPV**	PV 3*	Locality PV3	NT	Locality NT	NPEV	Locality NPEV	CVA7	Locality CVA7	CVA9	Locality CVA9	CVA10	Locality CVA10	CVA16	Locality CVA16	CVAA21	Locality CVA21	CVB (unspecified)	Locality CVB	CVB1	Locality CVB1	CVB2	Locality CVB2	CVB3	Locality CVB3	CVB4	Locality CVB4	CVB5	Locality CVB5	Coxs B6	Locality CVB6	E1	Locality E1	E3	Locality E3	E 6	Locality E6	E 7	Locality E7
	1958	NA	NA
	1959	NA	NA
	1960	NA	NA
	1961	NA	NA
	1962	NA	NA
	1963	24	1			1	BA
	1964	27	5											2	2xBA																			2	2xBA					1	BA
	1965	NA	NA
	1966	NA	NA
	1967	20	2													1	BA																													1	BA
	1968	153	13					4	4xBA			1	BA							1	BA																					1	BA			4	4xBA
	1969	49	10									3	3xBA			7	7xBA
	1970	281	48											43	10xBA, 33xWSR															2	2xWSR							3	2xBA, 1xWSR
	1971	364	21	6	4xBA, 2xWSR			1	ZSK							14	14xWSR
	1972	366	41					2	1xBA,1xWSR							39	9xBA, 30xWSR
	1973	444	70			2	1xBA,1xWSR	1	BA			3	2xBA,1xWSR			64	9xBA, 55xWSR
	1974	336	93	1	BA							3	3xBA			89	10xBA, 79xWSR
	1975	179	54													54	10xBA, 44xWSR
	1976	438	174	12	12xBA	2	2xWSR									160	33xBA, 127xWSR
	1977	404	114	1	WSR											113	105xBA,8xWSR
	1978	220	61			1	WSR									60	60x WSR
	1979	92	11			1	WSR									10	10x WSR
	1980	95	25	2	WSR											23	23x WSR
	1981	40	14													4	4x WSR															3						2				2						2
	1982	35	4													4	4x WSR
	1983	42	4													4	4x WSR
	1984	35	4													4	4x WSR
	1985	40	6													6	6xBA
	1986	35	15					2	2x WSR			1	WSR			11	11x WSR																															1
	1987	35	13			3	3xWSR	1	WSR			2	2xWSR			7	7x WSR
	1988	32	10			2	2xWSR					2	2xWSR			6	6x WSR
	1989	36	10			4	4xWSR					3	3xWSR			3	3x WSR
	1990	33	8			5	5xWSR					3	3xWSR
	1991	9	1			1	WSR
	1992	13	1													1	WSR
	1993	0	0
	1994	0	0
	1995	0	0
	1996	3	1																																					1	WSR
	1997	10	0
	1998	23	1													1	MA
	1999	48	3																																	1	SK	1	TN							1	SR
	2000	93	13					3	1xBA, 1xMA, 1x PN			4	1xGA,1xSE, 1xKN, 1x MA			1	PN																					4	1x TT, 1x NZ, 1xMA, 1x SI
	2001	96	16			3	1x BA,1x RC-CB, 1x RC-AD	4	2xPN, 2X BA			3	1x PN, 1xDS, 1x RC-AD			3	1x DS, 1x PN, 1x TO																	1	SE
	2002	117	19					3	1x BA, 1x PN, 1x MA			4	2x PN, 1xBA, 1x MA													1	1x RC-AD							9	1x BA, 1xZM, 1x NZ,2x MA, 1x SE, 1x SI, 1x PN, 1x TO,
	2003	70	44					4	2x BA, 1x PN, 1x RC-ME	3	1x SI, 2x BA	3	3x BA,																			3	1x SE, 1x NT, 1x SR	8	3x BA, 1x DS, 1x SE, 1xTT, 2x SI	2	1x BA, 1x PN	2	1x BA, 1x SR					1	MA	6	3x BA, 1x MA, 1x TO, 1x PN
	2004	278	117			3	SI	12	11x SI, 1x RC -GA	34	SI	7	5x SI, 1xRC- CB, 1x RC-BR											1	SI			1	SI							5	1xZM, 1x SE, 2x SI, 1x BA,	16	1x MA, 1xGA, 1x BA, 11x SI					25	1x NT, 24x SI
	2005	188	39							10	SI	2	1x RC-CB, 1x BA											1	SI	1	SI	1	SE			1	PN			4	1x RC-BR, 1x RC-RO, 2x SI	6	4x sI, 1x NZ, 1x RC-BR					11	8x SI, 1x NT, 1x MA, 1x SR	1	GA
	2006	92	7																															1	PN	2	1x KN, 1x SI											1	SI
	2007	220	34			2	GA, SI									3	WSR					1	GA			1	DS	5	1x MA,1x TO, 1x SE, 1x PN, 1x SI			6	1x SE, 1x NT, 1x SR, 1x MA, 1x ZM, 1x SI			4	2x SI, 1x ZM, 1x NZ	4	1x MA, 1x TO, 1x SE, 1xPN							3	2x TT, 1x NZ	1	WSR
	2008	146	26																															20	WSR			5	WSR
	2009	140	38									1	WSR																			17	WSR			2	WSR	8	WSR					7	WSR	1	WSR
	2010	131	34																											2	WSR	5	WSR			1	WSR	18	WSR					3	WSR			2	WSR
	2011	132	34															1	WSR					1	WSR			8	WSR			1	WSR					7	WSR					4	WSR	3	WSR	5	WSR
	2012	135	54																									22	WSR	1	WSR	4	WSR			1	WSR	6	WSR							4	WSR
	2013	135	42					1	WSR							7	WSR											12	WSR															4	WSR	7	WSR
	2014	127	71													23	WSR							1	WSR			2	WSR			1	WSR			5	WSR	13	WSR							2	WSR	9
	2015	127	64									1	WSR			8	WSR							1	WSR			3	WSR			2	WSR			13	WSR	14	WSR							10	WSR	5	WSR
	2016	133	60													22	WSR																			4	WSR	22	WSR							5	WSR		WSR
	2017	133	68													18	WSR																			4	WSR	31	WSR					1	WSR			2	WSR
	2018	133	50													12	WSR							1	WSR					2	WSR					3	WSR	16	WSR					2	WSR	6	WSR
	2019	133	42													4	WSR															1				1	WSR	33	WSR									1	WSR
	Total:	6720	1710	22		30		38		47		46		45		786		1		1		1		6		3		54		7		44		41		52		211		2		3		58		54		29
	Abbreviations:	NT= not further typed
		NPEV = nonpolio enteroviruses
		CVA = coxsackievirus A, serotypes are numbered
		CVB = coxsackievirus B, serotypes are numbered
		Poliovirus = PV
		E = Echovirus, serotypes are numbered
		unspecified = not identified to different serotypes
		NA = data not available
		PV 1*,2*,3* = since 2000 these are vaccine strains of SL (Sabin like) typed at RRL in Helsinki, Finland. Before 2000 the specific PV strains have not been identified
		RC = Refugee camp
		VDPV = Vaccine derived PV
	Localities:	all sampling localities
		WSR = West Slovakian Region
		BA = Bratislava
		BL = Bratislava suburbs
		DS = Dunajská Streda
		GA = Galanta
		KN = Komárno
		LV = Levice
		MA=Malacky
		NR = Nitra
		NZ = Nové Zámky
		PN=Piešťany
		SE=Senica
		SI = Skalica
		SR = Štúrovo
		TN = Trenčín
		TO = Topoľčany
		TT = Trnava
		ZM=Zlaté Moravce
		RC = Refugee camps in: GB = Gabčíkovo, ME = Medveďov, RO = Rohovce, CB´=Čierne Blato, AD´=Adamov, BR´= Brezová pod Bradlom,
		O = Orphanages: HO= Horné Orechové
[truncated: 31 more columns]
