# Supplementary material for: History of the Wastewater Assessment of Polio and Non-Polio Enteroviruses in the Slovak Republic in 1963–2019
Source: Viruses. 2022 Jul 22;14(8):1599. doi: 10.3390/v14081599 (PMC9331368; doi:10.3390/v14081599)
Supplement: Supplementary file 1 [file viruses-14-01599-s001.zip › Supplementary Table S3 BBystrica Sewagewaters.xlsx]

## Sheet: Hárok1
	Supplementary Table S3
	Banska Bystrica Laboratory - Sewage water sampling																0
	Year	number of waters examined	number of positive isolations	PV (not specified)	Locality PV	PV1*	Locality PV1	PV2 *	Locality PV2	P 3*	Locality PV3	NPEV	Locality NPEV	CVA (not specified)	Locality CVA	CVA9	Locality CVA9	CVB (not specified)	Locality CVB	CVB1	Locality CVB1	CVB2	Locality CVB2	CVB3	Locality CVB3	CVB4	Locality CVB4	CVB5	Locality CVB5	E3	Locality E3	E6	Locality E6	E7	Locality E7	E8	Locality E8	E9	Locality E9	E11	Locality E11	E13	Locality E13	E14	Locality E 14	E 16	Locality E 16	E 17	Locality E 17
	1958	0	0
	1959	0	0
	1960	0	0
	1961	0	0
	1962	0	0
	1963	0	0
	1964	0	0
	1965	0	0
	1966	0	0
	1967	0	0
	1968	185	45
	1969	192	92
	1970	437	238	85	44x BB, 41x CSR*							153	93x BB, 60x CSR
	1971	474	149	14	14x BB							135	76x BB, 59x CSR
	1972	517	138	42	29x BB, 2x DK, 2x LC, 4x MT, 3x PB, 2x RS							96	71x BB, 3x ZA, 2x ZH, DK, LM, 5x MT, 2x PB, 7xPD, 4x RS
	1973	488	42	17	17x BB							25	LM, PB, 2x PD, 2x ZA, 2x ZH
	1974	NA	NA
	1975	NA	NA
	1976	NA	NA
	1977	NA	NA
	1978	NA	NA
	1979	NA	NA
	1980	44	12																									3	3x PD							1	1x BB			2	2x PD			2	BB, PD	4	2x BB, 2x PD
	1981	56	0
	1982	57	0
	1983	55	0
	1984	32	1											1	BB
	1985	9	0
	1986	50	16			2	BB, MT	2	BB, MT	1	BB	1	BB			2	BB, MT			1	MT	1	MT	1	BB	2	BB, MT					3	BB, 2x MT
	1987	60	5									5	BB, 4x MT
	1988	70	13									9	2x BB, 7x MT															1	BB											3	2x BB, MT
	1989	17	5									2	2x BB																									1	CSR	2	CSR
	1990	7	0
	1991	0	0
	1992	0	0
	1993	3	0
	1994	4	0
	1995	0	0
	1996	3	0
	1997	13	0
	1998	13	0
	1999	70	7																													7	MT,2x VK,2x PD,2x RS
	2000	82	2							1	DK																	1	MT
	2001	85	3
	2002	82	1																					1	LC
	2003	81	6																													3	DK, ZA, CA							3	LC, 2x CA
	2004	87	12			1	ZA	2	ZA, RS																			4	CA, ZV, 2x DK			1	DK							3	3x CA
	2005	87	2																									2	PD, LC
	2006	89	15																					1	CA	3	CA, 2x DK	4	BB, DK, LM, CA					6	LM, BB, 2x CA, 2x MT							1	MT
	2007	84	2																															1	BB													1	DK
	2008	84	6																					4	2x BB, 2x RS															1	LC
	2009	84	7																			1	ZA							4	BB, ZA, 2x PB
	2010	84	6																									6	DK,PD,2xMT,2xZA
	2011	84	2																											1	PB									1	MT
	2012	84	1
	2013	84	8									2	MT, PD					3	MT, DK, CA									1	CA											2	DK, CA
	2014	84	1									1	CA
	2015	84	0
	2016	84	8									2	PB, ZA													1	ZV	4	BB, LC, PB, MT											1	PB
	2017	84	3																							1	LC
	2018	84	5																			1	DK			2	CA, MT	1	CA
	2019	84	11									2																9
	Total:	4541	864	158		3		4		2		433		1		2		3		1		3		7		9		36		5		14		7		1		1		18		1		2		4		1
		Note: Till the year 1973 the focus was on polioviruses
	Abbreviations:
		Poliovirus = PV
		NPEV = nonpolio enteroviruses
		CVA = coxsackievirus A, serotypes are numbered
		CVB = coxsackievirus B, serotypes are numbered
		E = Echovirus, serotypes are numbered
		unspecified = not identified to different serotypes
		NA = data not available
		PV 1*,2*,3* = since 2000 these are vaccine strains of SL (Sabin like) typed at RRL in Helsinki, Finland.
		RC = Refugee camp
		VDPV = Vaccine derived PV
	Localities:	Sampling localities
		CSR* = Central Slovakian Region (used when locality not specified in records)
		BB = Banská Bystrica
		CA = Čadca
		DK = Dolný Kubín
		LC = Lučenec
		LM = Liptovský Mikuláš
		MT = Martin
		PB = Považská Bystrica
		PD = Prievidza
		RS = Rimavská Sobota
		VK = Veľký Krtíš
		VK = Veľký Krtíš - refugee camp
		ZA = Žilina
		ZV = Zvolen
		ZH = Žiar nad Hronom
[truncated: 8 more columns]
