# Supplementary material for: History of the Wastewater Assessment of Polio and Non-Polio Enteroviruses in the Slovak Republic in 1963–2019
Source: Viruses. 2022 Jul 22;14(8):1599. doi: 10.3390/v14081599 (PMC9331368; doi:10.3390/v14081599)
Supplement: Supplementary file 1 [file viruses-14-01599-s001.zip › Supplementary Table S4 Kosice Sewagewaters.xlsx]

## Sheet: Hárok1
	Supplementary Table S4
	Kosice Laboratory - Sewage water sampling
	Year	number of waters examined	number of positive isolations	PV (not specified)	Locality PV	PV 1*	Locality PV1	PV 2 *	Locality PV2	PV 3*	Locality PV3	NT	Locality NT	NPEV	Locality NPEV	CVA (unspecified)	Locality CVA	CVA1	Locality CVA1	CVA2	Locality CVA2	CVA3	Locality CVA3	CVA4	Locality CVA4	CVA5	Locality CVA5	CVA6	Locality CVA6	CVA7	Locality CVA7	CVA8	Locality CVA8	CVA9	Locality CVA9	CVB (unspecified)	Locality CVB	CVB1	Locality CVB1	CVB2	Locality CVB2	CVB3	Locality CVB3	CVB4	Locality CVB4	CVB5	Locality CVB5	CVB6	Locality CVB6
	1958	0	0
	1959	0	0
	1960	0	0
	1961	0	0
	1962	0	0
	1963	0	0
	1964	0	0
	1965	176	40																															1	KE			2	2xKE	11	9xKE	2	1xKE	9	5xKE	8	5xKE	4	4xKE
	1966	NA	NA
	1967	310	102			9	8xKE	3	1xKE	3	1xKE	15	13xKE	2	2xKS															1	1xKE	1	1xKS	1	1xKE							19	15xKE,2xKS	5	5xKE	14	12xKE,1xKS	1	1xKE
	1968	684	338			47	25xKE,10xKS,8xPO	66	42xKE,14xKS,8xPO	48	30xKE,8xKS,7xPO			174	91xKE, 32xKS, 34xPO			1	1xKE			1	1xKE			1	1xKE
	1969	614	263			27	19xKE,3xKS,4xPO	28	17xKE,10xKS,	28	18xKE,10xKS,			180	116xKE, 27xKS,10xPO
	1970	698	327			14	7xKE, 7xPO	28	20xKE,7xPO	22	15xKE, 7xPO	161	43xKE,34xPO	93	69xKE, 24xPO					4	4xKE	2	2xKE	1	1xKE	2	1xKE,1xPO
	1971	963	422			37	32xKE,5xPO	103	76xKE, 19xPO	84	68xKE,14xPO	101	45xKE, 46xVSK,10xPO	94	53xKE,29xPO							2	2xKE					1
	1972	308	211			48	39xKE, 9xPO	6	5xKE,	8	7xKE,	66	49xKE, 12xPO	82	56xKE,26xPO													1	1xKE
	1973	220	186			39	39xKE, 9xPO	8	8xKE	8	8xKE	1	1xKE	129	129xKE													1	1xKE
	1974	440	29			3	3xKE							26	21xKE
	1975	625	83			22	22xKE	1	1xKE			3	1xKE,1xVSK	35	16xKE,17xVSK																									2	2xVSK			3	3xKE			2	2xKE
	1976	457	88			1	1xKE	3	3xKE	2	2xKE	1	1xKE	81	15xKE, 66xVSK
	1977	231	96			2	2xVSK	2	2xVSK	1	1xVSK	41	41xVSK	50	10xKE,38xVSK
	1978	91	14											14	SN,TV,PO,PP,KS,BJ,KE,SK
	1979	90	2											2	BJ,SL
	1980	87	1											1	MI
	1981	22	0
	1982	11	1									1
	1983	NA	NA
	1984	NA	NA
	1985	0	0
	1986	11	2											2
	1987	23	1											1
	1988	24	1
	1989	39	2											1
	1990	38	3											2
	1991	23	0
	1992	16	1
	1993	9	0
	1994	18	0
	1995	13	0
	1996	11	0
	1997	13	0
	1998	15	0
	1999	43	0
	2000	70	0
	2001	73	4			1	1xMI	2	MI,PP	1	1xKE
	2002	82	2																																							2	KS,VT
	2003	77	8					1	1xPP	3	PP,MI,KE																			1	1xSN									1	1xHE					2	PP,KE
	2004	72	6																																											2	KE,PO
	2005	78	7			1	SL			1	SL
	2006	75	12			1	VT															1	TV	2	PO,SL	1	SL
	2007	78	2																							1	SN
	2008	92	9
	2009	93	9																											1	TV													1	BJ	1	PO
	2010	83	0
	2011	89	8																											1	TV
	2012	85	8																																											2	VT,SL
	2013	91	7											1	SL																					1	SL			1	SL					1	TV
	2014	83	3																																									1	MI	2	2xMI
	2015	95	3											3	SK,2xTV
	2016	84	2
	2017	87	0
	2018	90	2											1	PO
	2019	77	2											1																																1
	Total	7977	2307	0		252		251		209		390		975		0		1		4		6		3		5		3		4		1		2		1		2		15		23		19		33		7
	Abbreviations:	NT= not further typed
		NPEV = nonpolio enteroviruses
		CVA = coxsackievirus A, serotypes are specified
		CVB = coxsackievirus B, serotypes are apecified
		Poliovirus = PV
		E = Echovirus, serotypes are specified
		CPA = cytopathogenic agent
		unspecified = not identified to different serotypes
		NA = data not available	NA= not done
		PV 1*,2*,3* = since 2000 these are vaccine strains of SL (Sabin like) typed at RRL in Helsinki, Finland.
		SW = Sewage water
		SF = Surface flow
		VDPV = Vaccine derived PV
	Localities:	sampling localities in VSK region
		VSK* = East Slovakian Regions where locality was not specified
		BJ = Bardejojv
		GL = Gelnica
		HE = Humenné
		KE = Košice
		KS = Košice - okolie
		KK = Kežmarok
		MI = Michalovce
		PO = Prešov
		PP = Poprad
		RV = Rožňava
		SK = Svidník
		SL = Stará Ľubovňa
		SN = Spišská Nová Ves
		TV = Trebišov
		VT = Vranov nad Topľou
[truncated: 43 more columns]
